# Supplementary material for: A systematic review of educational interventions aiming to reduce prehospital delay in patients with acute coronary syndrome
Source: PubMed Central journal article supplement — Open Heart. 2020 Mar 11;7(1):e001175. doi: 10.1136/openhrt-2019-001175 (PMC7066622; doi:10.1136/openhrt-2019-001175), 2020-03-11
Supplement: openhrt-2019-001175supp001.pdf [file openhrt-2019-001175supp001.pdf]

**Supplementary Table A1:** Reporting quality assessed through the TIDier checklist

| TIDieR (Template for Intervention Description and Replication) CHECKLIST |     |             |             |     |     |       |                       |                |                   |         |        |  |
|--------------------------------------------------------------------------|-----|-------------|-------------|-----|-----|-------|-----------------------|----------------|-------------------|---------|--------|--|
| Name                                                                     | Why | What<br>(M) | What<br>(P) | Who | How | Where | When<br>(How<br>much) | Tailor-<br>ing | Modifi-<br>cation | Planned | Actual |  |
| Bray et al. 2015                                                         | √   | √           | √           | √   | √   | √     | √ (n/r)               | n/r            | n/r               | n/r     | n/r    |  |
| Thuresson et al. 2015                                                    | √   | √           | √           | √   | n/r | √     | √ (n/r)               | n/r            | √                 | n/r     | n/r    |  |
| Tummala and Farshid, 2015                                                | √   | √           | √           | √   | √   | √     | √ (n/r)               | n/r            | n/r               | n/r     | n/r    |  |
| Pereira et al. 2013                                                      | √   | √           | √           | √   | √   | √     | √ (√)                 | n/r            | √                 | n/r     | n/r    |  |
| Naegeli et al. 2011                                                      | √   | √           | √           | √   | √   | √     | √ (√)                 | n/r            | √                 | n/r     | n/r    |  |
| Diercks et al. 2010                                                      | √   | √           | n/r         | n/r | √   | n/r   | √ (n/r)               | n/r            | n/r               | n/r     | n/r    |  |
| Luepker et al. 2000                                                      | √   | √           | √           | √   | √   | √     | √ (√)                 | √              | n/r               | √       | √      |  |
| Gaspoz et al. 1996                                                       | √   | √           | √           | √   | √   | √     | √ (√)                 | √              | √                 | n/r     | n/r    |  |
| Blohm et al. 1994                                                        | √   | √           | √           | √   | √   | √     | √ (n/r)               | n/r            | n/r               | n/r     | n/r    |  |
| Bett et al. 1993                                                         | √   | √           | √           | √   | √   | √     | √ (√)                 | n/r            | n/r               | n/r     | n/r    |  |
| Moses et al. 1991                                                        | √   | √           | √           | √   | n/r | √     | n/r (√)               | n/r            | √                 | n/r     | n/r    |  |
| Ho et al. 1989                                                           | √   | √           | √           | √   | √   | √     | √ (√)                 | n/r            | √                 | n/r     | n/r    |  |
| Mitic et al. 1984                                                        | √   | √           | √           | √   | √   | √     | n/r (√)               | n/r            | n/r               | n/r     | n/r    |  |
| Mooney et al. 2014                                                       | √   | √           | √           | √   | √   | √     | √ (√)                 | √              | n/r               | √       | √      |  |
| Dracup et al. 2009                                                       | √   | √           | √           | √   | √   | √     | √ (√)                 | √              | n/r               | √       | √      |  |
| Meischke et al. 1997                                                     | √   | √           | √           | √   | n/r | √     | √ (√)                 | n/r            | n/r               | n/r     | n/r    |  |
| Blank and Smithline 2002                                                 | √   | √           | √           | √   | √   | n/r   | n/r (√)               | n/r            | n/r               | n/r     | n/r    |  |
| Black and Brown. 1973                                                    | √   | √           | √           | √   | √   | √     | √ (n/r)               | n/r            | n/r               | n/r     | n/r    |  |

(M=methods, P=procedures, n/r =not reported)

**Supplementary Table A2:** Risk of bias in RCT as assessed via the RoB II tool

| COCHRANE RISK OF BIAS (RoB II) |                                      |                                   |                    |                  |                  |                  |
|--------------------------------|--------------------------------------|-----------------------------------|--------------------|------------------|------------------|------------------|
|                                | <b>Selection<br/>(Randomization)</b> | <b>Selection<br/>(Allocation)</b> | <b>Performance</b> | <b>Detection</b> | <b>Attrition</b> | <b>Reporting</b> |
| Mooney et al. 2014             | L                                    | L                                 | U                  | H                | L                | L                |
| Luepker et al. 2000            | U                                    | L                                 | H                  | H                | L                | L                |
| Dracup et al. 2009             | L                                    | L                                 | L                  | H                | L                | L                |
| Meischke et al. 1997           | L                                    | U                                 | U                  | H                | L                | L                |
| Blank and Smithline 2002       | L                                    | L                                 | U                  | H                | L                | L                |

(L=low, U=unclear; H=high)
